# Supplementary material for: Achieving long carrier lifetime and high optical gain in all-inorganic CsPbBr3 perovskite films via top and bottom surface modification
Source: Royal Society of Chemistry journal article supplement (doi:10.1039/c9cp04033a), 2019-01-01
Supplement: c9cp04033a1.pdf [file c9cp04033a1.pdf]

## Supporting Information

Achieving long carrier lifetime and high optical gain in all-inorganic CsPbBr<sub>3</sub> perovskite films through top and bottom surface modification

Li Jiang, Zhishan Fang, Haoran Lou, Chen Lin, Zhanhang Chen, Jing Li, Haiping He,\* and Zhizhen Ye\*

State Key Laboratory of Silicon Materials, School of Materials Science and Engineering, Zhejiang University, Hangzhou 310027, China

\*Corresponding authors. Email: [hphe@zju.edu.cn](mailto:hphe@zju.edu.cn), [yezz@zju.edu.cn](mailto:yezz@zju.edu.cn)

### Supplementary Note 1

The grain size of perovskite films could be estimated by Debye-Scherrer equation:  $D = k \lambda / B \cos \theta$ , where  $k = 0.89$  is the Scherrer constant,  $\lambda = 0.15406$  nm is X-ray wavelength and  $B$  is the FWHM of diffraction peak. In our films, the  $B$  values of  $15^\circ$  and  $30.5^\circ$  peaks are  $0.18^\circ$  and  $0.22^\circ$  respectively. The grain size of films is thus determined to be roughly 47 nm.

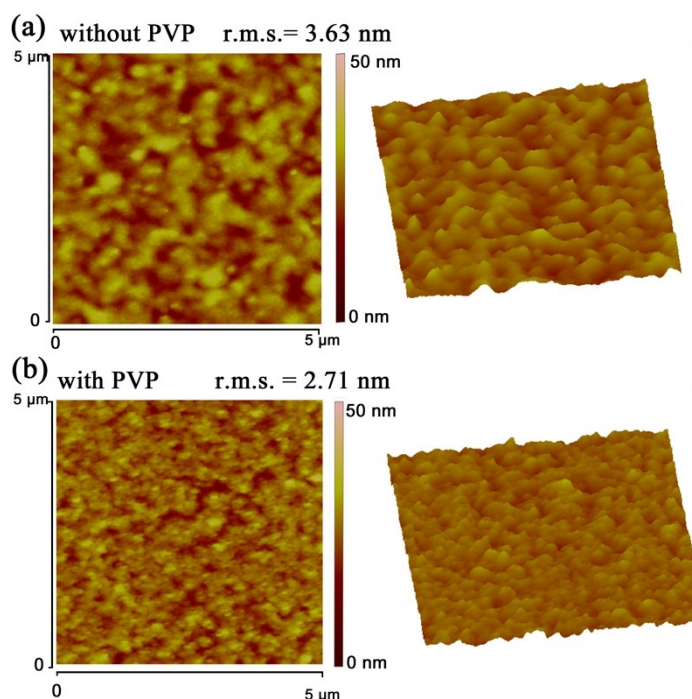

Figure S1. AFM images from perovskite film (a) without a PVP layer and (b) with a PVP layer on the substrate.

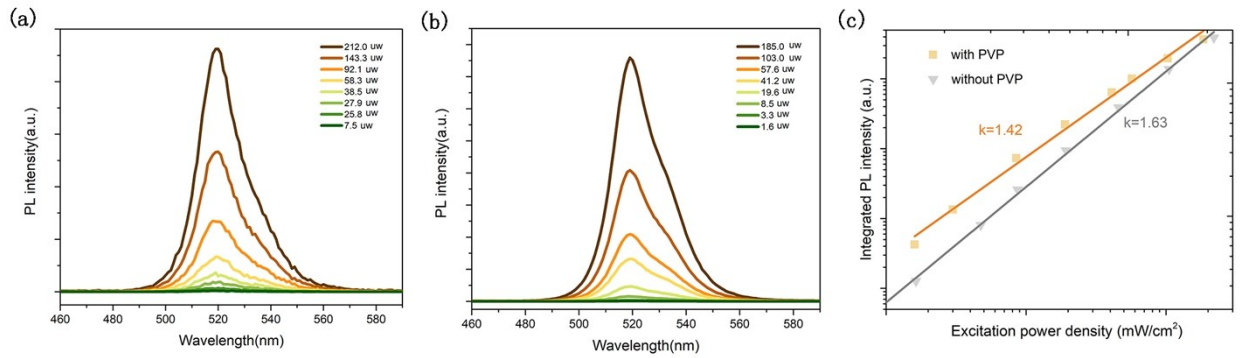

Figure S2. Excitation density-dependent PL measurements from perovskite film (a) without a PVP layer or (b) with a PVP layer. (c) Fitting result of excitation density-dependent PL measurements.

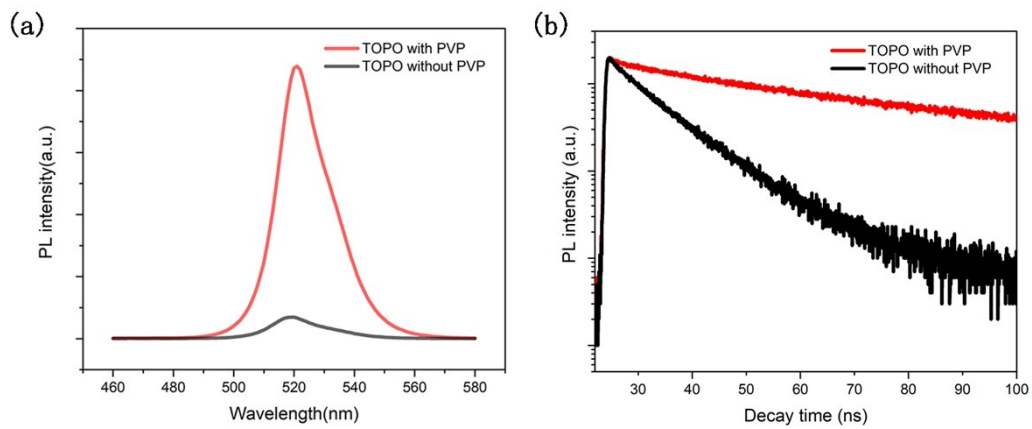

Figure S3. (a) Steady-state PL spectra (b) Transient PL decay measurements from TOPO-treated perovskite films with or without a PVP layer.

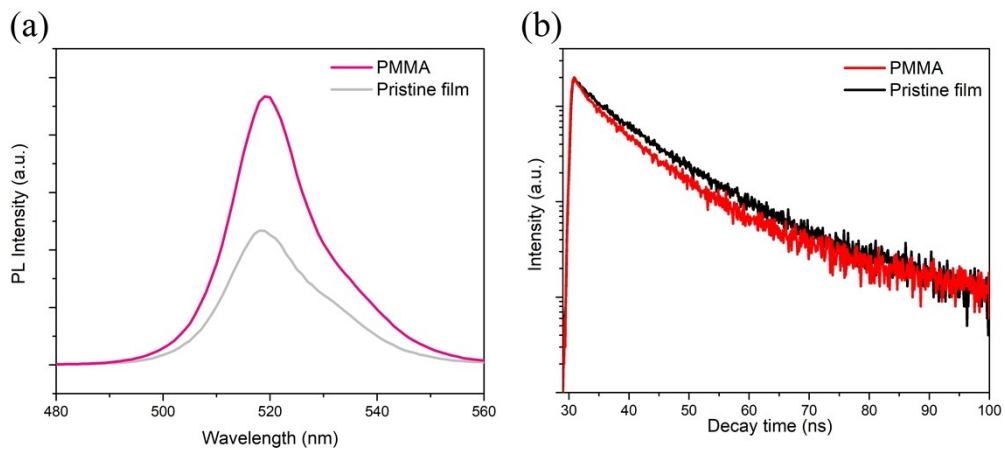

Figure S4. (a) Steady-state PL spectra (b) Transient PL decay from PMMA-treated perovskite film and pristine film.

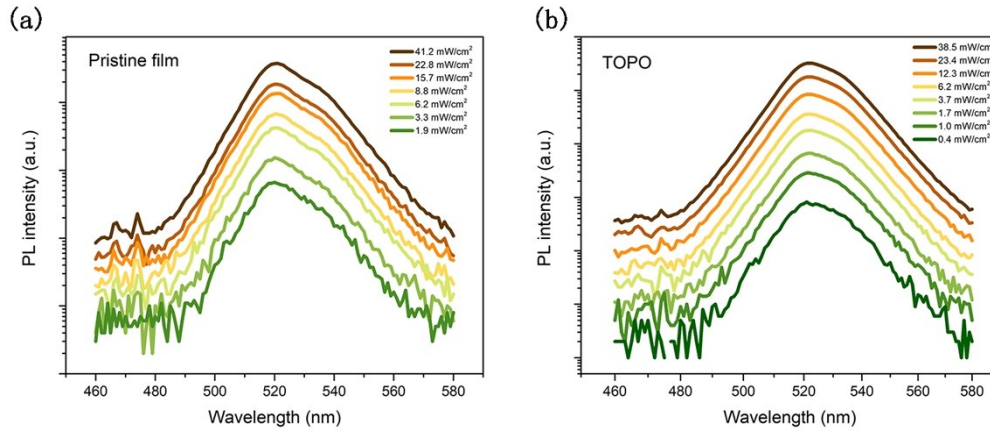

Figure S5. Excitation density-dependent PL measurements from (a) pristine film and (b) TOPO-treated perovskite film.

Table S1. Gain coefficient and carrier lifetime comparison of CsPbBr<sub>3</sub> perovskite film as optical gain medium

|                                    | Gain (cm <sup>-1</sup> ) | Carrier lifetime (ns) | Publish year | Ref. |
|------------------------------------|--------------------------|-----------------------|--------------|------|
| CsPbBr <sub>3</sub> single crystal | 38                       | 8                     | 2019         | 1    |
| CsPbBr <sub>3</sub> NCs film       | 450±30                   | ~1.5                  | 2015         | 2    |
| CsPbBr <sub>3</sub> NCs film       |                          | 11                    | 2015         | 3    |
| CsPbBr <sub>3</sub> NCs film       |                          | ~7                    | 2016         | 4    |
| CsPbBr <sub>3</sub> NCs film       |                          | ~8                    | 2016         | 5    |
| CsPbBr <sub>3</sub> NCs film       | ~580                     | ~5                    | 2016         | 6    |
| CsPbBr <sub>3</sub> NCs film       | 98                       | 3.1                   | 2015         | 7    |
| CsPbBr <sub>3</sub> NCs film       |                          | 1.6                   | 2018         | 8    |
| CsPbBr <sub>3</sub> NCs film       |                          | 12.52                 | 2018         | 9    |
| CsPbBr <sub>3</sub> NCs film       | 51                       | 3.64; 8.16            | 2018         | 10   |
| CsPbBr <sub>3</sub> NCs film       | ~502                     |                       | 2018         | 11   |
| CsPbBr <sub>3</sub> film           |                          | 21.99                 | 2017         | 12   |
| CsPbBr <sub>3</sub> film           |                          | 2.01-3.53             | 2017         | 13   |
| CsPbBr <sub>3</sub> film           | 100 (10 K)               |                       | 2017         | 14   |
| CsPbBr <sub>3</sub> film           | >300                     | 1-5                   | 2018         | 15   |
| Our work                           | 694                      | 44                    | 2019         |      |

## Reference

1. C. Zhao, W. Tian, J. Li, Q. Sun, J. Luo, H. Yuan, B. Gai, J. Tang, J. Guo and S. Jin, *Journal of Physical Chemistry Letters*, 2019, **10**, 2357-2362.
2. S. Yakunin, L. Protesescu, F. Krieg, M. I. Bodnarchuk, G. Nedelcu, M. Humer, G. De Luca, M. Fiebig, W. Heiss and M. V. Kovalenko, *Nature Communications*, 2015, **6**.
3. J. Pan, S. P. Sarmah, B. Murali, I. Dursun, W. Peng, M. R. Parida, J. Liu, L. Sinatra, N. Alyami, C. Zhao, E. Alarousu, T. K. Ng, B. S. Ooi, O. M. Bakr and O. F. Mohammed, *Journal of Physical Chemistry Letters*, 2015, **6**, 5027-5033.
4. Y. Tong, E. Bladt, M. F. Aygueler, A. Manzi, K. Z. Milowska, V. A. Hintermayr, P. Docampo, S. Bals, A. S. Urban, L. Polavarapu and J. Feldmann, *Angewandte Chemie-International Edition*, 2016, **55**, 13887-13892.
5. Q. A. Akkerman, M. Gandini, F. Di Stasio, P. Rastogi, F. Palazon, G. Bertoni, J. M. Ball, M. Prato, A. Petrozza and L. Manna, *Nature Energy*, 2017, **2**.
6. Y. Xu, Q. Chen, C. Zhang, R. Wang, H. Wu, X. Zhang, G. Xing, W. W. Yu, X. Wang, Y. Zhang and M. Xiao, *Journal of the American Chemical Society*, 2016, **138**, 3761-3768.
7. Y. Wang, X. Li, J. Song, L. Xiao, H. Zeng and H. Sun, *Adv. Mater.*, 2015, **27**, 7101-+.
8. Y. Wang, M. Zhi, Y.-Q. Chang, J.-P. Zhang and Y. Chan, *Nano Letters*, 2018, **18**, 4976-4984.
9. M. Imran, V. Caligiuri, M. Wang, L. Goldoni, M. Prato, R. Krahne, L. De Trizio and L. Manna, *Journal of the American Chemical Society*, 2018, **140**, 2656-2664.
10. A. Dey, P. Rathod and D. Kabra, *Advanced Optical Materials*, 2018, **6**.
11. Z. Liu, J. Yang, J. Du, Z. Hu, T. Shi, Z. Zhang, Y. Liu, X. Tang, Y. Leng and R. Li, *Acs Nano*, 2018, **12**, 5923-5931.
12. C. Li, Z. Zang, C. Han, Z. Hu, X. Tang, J. Du, Y. Leng and K. Sun, *Nano Energy*, 2017, **40**, 195-202.
13. Z.-J. Yong, Y. Zhou, J.-P. Ma, Y.-M. Chen, J.-Y. Yang, Y.-L. Song, J. Wang and H.-T. Sun, *Acs Applied Materials & Interfaces*, 2017, **9**, 32920-32929.
14. M. L. De Giorgi, A. Perulli, N. Yantara, P. P. Boix and M. Anni, *Journal of Physical Chemistry C*, 2017, **121**, 14772-14778.
15. L. Zhang, F. Yuan, H. Dong, B. Jiao, W. Zhang, X. Hou, S. Wang, Q. Gong and Z. Wu, *Acs Applied Materials & Interfaces*, 2018, **10**, 40661-40671.
